# Supplementary material for: A ligation-triggered and protein-assisted fluorescence anisotropy amplification platform for sensitive and selective detection of small molecules in a biological matrix
Source: Royal Society of Chemistry journal article supplement (doi:10.1039/c9ra09621c), 2020-01-01
Supplement: c9ra09621c1.pdf [file c9ra09621c1.pdf]

## Electronic Supplementary Material

# A ligation-triggered and protein-assisted fluorescence anisotropy amplification platform for sensitive and selective detection of small molecules in biological matrix

*Meizi Chen<sup>†, \*, a</sup>, Bing Wan<sup>†, b</sup>, Wei Du<sup>c</sup>, Hongbo Hu<sup>d</sup>, Long Zeng<sup>a</sup>, Xintong Duan<sup>a</sup>, Jia Liu<sup>a</sup>, Zixiang Wei<sup>a</sup>, Li Tang<sup>e</sup>, Yongbo Peng<sup>a, d\*</sup>*

<sup>a</sup>Department of General Internal Medicine, the First People's Hospital of Chenzhou, **Chenzhou 423000**, P.R. China.

<sup>b</sup>Department of Respiratory and Critical Care Medicine, the Affiliated Jiangning Hospital of Nanjing Medical University, **Nanjing 211100**, P.R. China.

<sup>c</sup>Department of Cardiology, the First People's Hospital of Chenzhou, **Chenzhou 423000**, P.R. China.

<sup>d</sup>Institute of Chinese Medicine, Hunan Academy of Chinese Medicine & Hunan University of Chinese Medicine, Changsha 410208, P.R. China.

<sup>e</sup>Radiation Oncology Center, Chongqing University Cancer Hospital/Chongqing Cancer Institute, Chongqing 400030, P. R. China

†. These authors contributed equally to this work.

\*. Correspondence author. E-mail address: [chenmeizi11@163.com](mailto:chenmeizi11@163.com); [pengyongbo2000@126.com](mailto:pengyongbo2000@126.com)

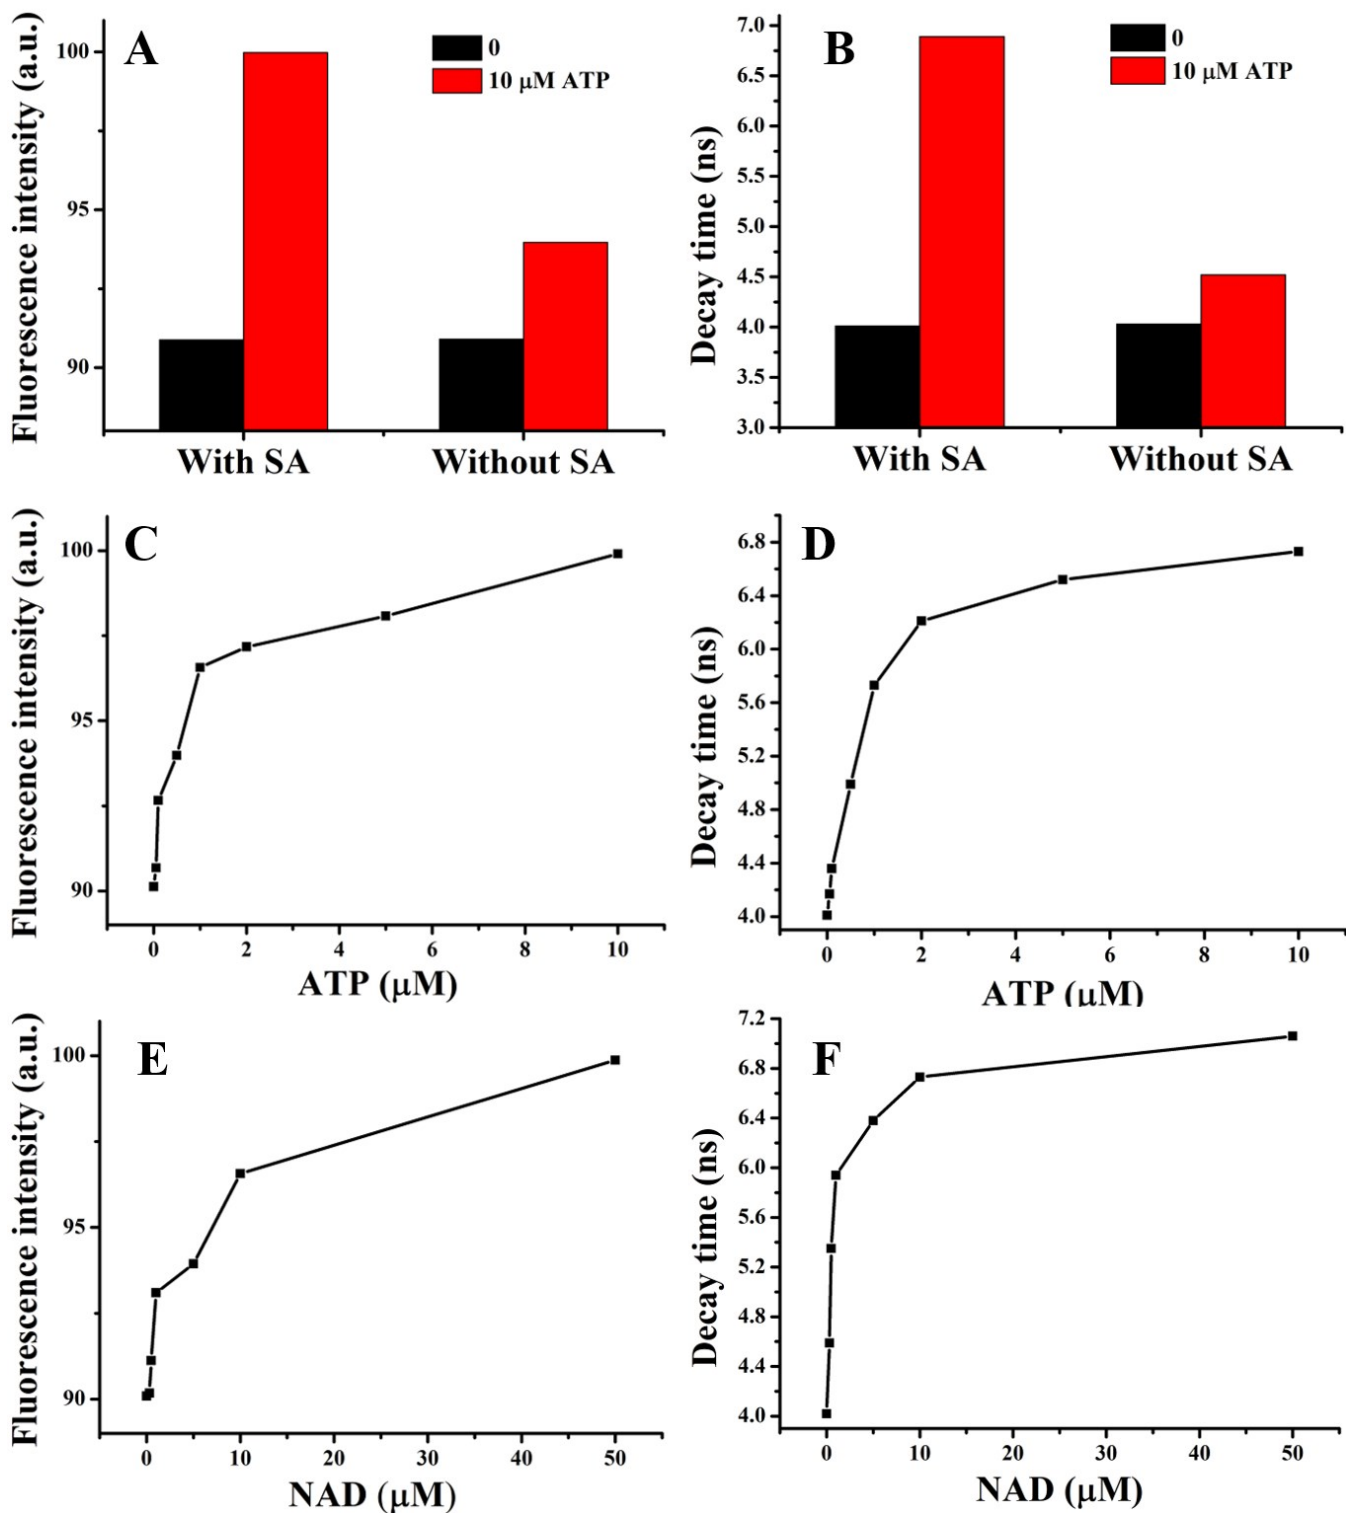

**Fig. S1** Fluorescence intensity (A) and lifetime (B) change with and without SA in the detection system. Fluorescence intensity (C, E) and lifetime (B, D) change of different concentrations of ATP (C, D) and NAD<sup>+</sup> (E, F).

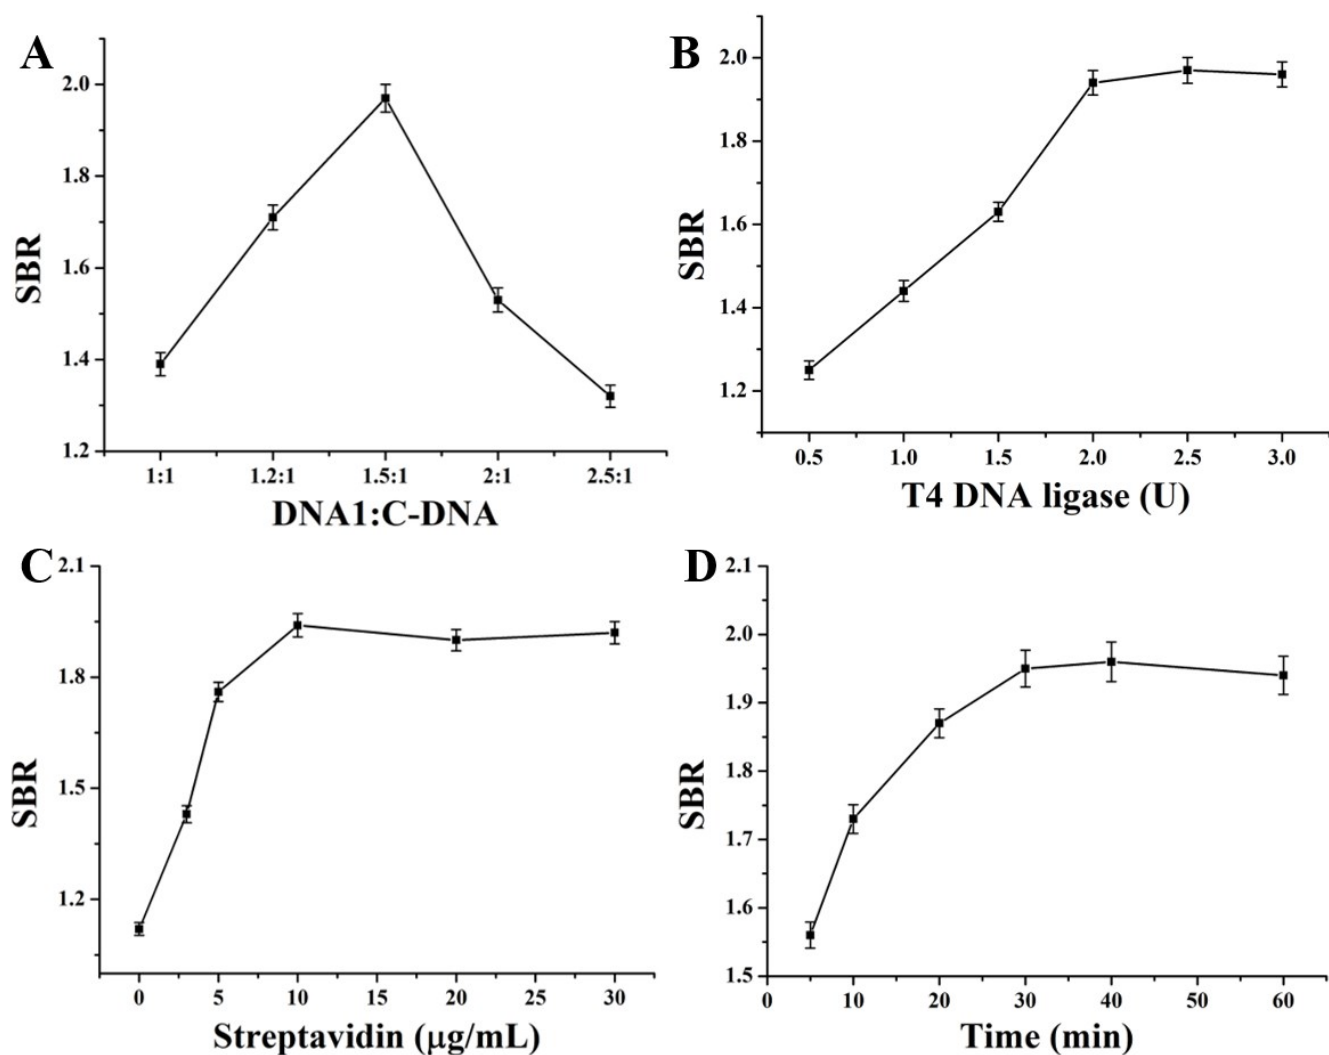

**Fig. S2** Optimal ratio of DNA 1 (DNA 2) to C-DNA (A), T4 DNA ligase (B), Streptavidin (C) and reaction time (D). At last, 1.5: 1, 2 U T4 DNA ligase,  $10 \mu\text{g}\cdot\text{mL}^{-1}$  SA, and 30 min reaction time were chosen respectively. SBR was defined as  $\text{FAV1} / \text{FAV0}$ , where FAV0 and FAV1 are the fluorescence anisotropy value in the absence (FAV0) and presence (FAV1) of targets, respectively.
